# Supplementary material
Source: publisher site journal article supplement (https://e-cmh.org/upload/media/cmh-2024-0904-Supplementary-Figure-1.pdf)
Supplement: Supplementary file 1 [file cmh-2024-0904-Supplementary-Figure-1.pdf]

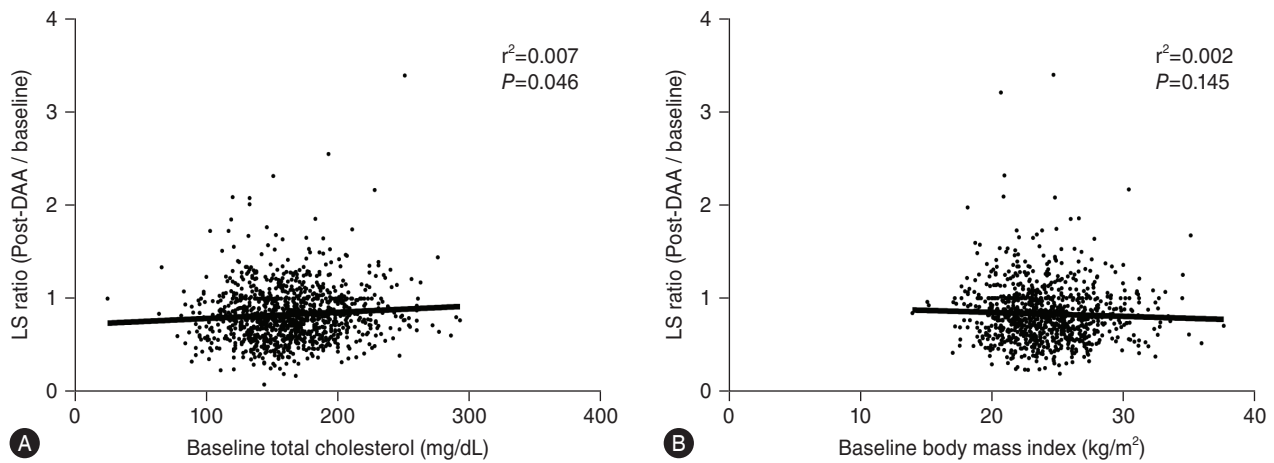

**Supplementary Figure 1.** h-TC interfering with LS improvement 6 months after the completion of DAA treatment. Correlation graphs presenting  $r^2$  and P-value between the (A) serum concentration of total cholesterol and (B) BMI, and the LS difference ratio at the 6-month time point (6 months/baseline). h-TC, hypercholesterolemia; LS, liver stiffness; DAA, direct-acting antiviral; BMI, body mass index.
